# Supplementary material
Source: PubMed Central journal article supplement (PMC2718151)

Biophysical Journal, Volume 97

**Supporting Material**

**Modulation of conductance-voltage relationship of BKCa channel by shortening the cytosolic loop connecting two RCK domains**

Ju-Ho Lee, Hyun-Ju Kim, Hae-Deun Kim, Byoung-Cheol Lee Jang-Soo Chun and Chul-Seung Park

## SUPPLEMENTARY FIGURE LEGENDS

### **Supplementary Figure 1. Serial deletions in NORS connecting two RCK domains.**

Representation of NORS deletion constructs and expression level of each construct. Schematic diagrams of NORS between RCK1 and RCK2 are shown. Individual deletions with indicated amino acid positions were constructed and expressed in CHO-K1 cells. Expression level was estimated by recording ionic currents of mutant channels in excised inside-out configuration ( + : <1nA, ++ : 1nA~5nA, +++ : >5nA). *none* indicates that the construct generates no detectable currents, even under extreme conditions. Shortening the NORS by deleting 10, 20, or 30 amino acids gave functional BK<sub>Ca</sub> channel, but deleting more than 40 amino acids gave no functional BK<sub>Ca</sub> channel when expressed in CHO-K1 cells. However, when random 10 amino acids are inserted into 40-deletion mutant, that mutant channel became functional.

### **Supplementary Figure 2. Positional deletions of 30-amino acids in NORS connecting two RCK domains.**

Representation of NORS deletion constructs and expression level of each construct. Schematic diagrams of NORS between RCK1 and RCK2 are shown. Individual deletions with indicated amino acid positions were constructed and expressed in CHO-K1 cells. Expression level was estimated by recording ionic currents of mutant channels in excised inside-out configuration ( + : <1nA, ++ : 1nA~5nA, +++ : >5nA). *none* indicates that the construct generates no detectable currents, even under extreme conditions. Two deletions at the most peripheral region on both sides of the loop ( $\Delta$ 30-1 and  $\Delta$ 30-7) resulted in non-functional channels.

### **Supplementary Figure 3. Functional effects of low-expressed 30-deletion mutants.**

**A.** Representative macroscopic current traces of the wild-type and low-expressed 30-deletion mutants ( $\Delta$ 30-2 and  $\Delta$ 30-6). The functional activity of each construct was tested in a whole-cell configuration due to the low expression level of the mutant proteins. Wild type channels were also recorded in whole-cell mode to compare with mutant channels. Ionic currents were induced by voltage steps ranging from -10 mV to 150 mV at 40 mV increments from the holding voltage of -100 mV. **B.** Normalized conductance-voltage relations ( $G/G_{max}$  vs.  $V_m$ ) of the wild-type (empty symbols) and mutant channels (filled symbols). The membrane was held at -100mV and then stepped from -80mV to 200mV in 10mV increment for 100 ms. The symbols for each mutant channel are indicated in the inset. Each channel was recorded with 2 $\mu$ M [Ca<sup>2+</sup>]<sub>i</sub>. Data points were fitted with the Boltzmann function. **C.** Membrane potential of half-maximal activation ( $V_{1/2}$ ) determined at 2  $\mu$ M [Ca<sup>2+</sup>]<sub>i</sub>. Each data point represents the mean $\pm$ S.E.M. Values differing from the wild type by the paired Student's t-test at p<0.05 (\*) or p<0.01 (\*\*) are indicated.

Supplementary Figure 1

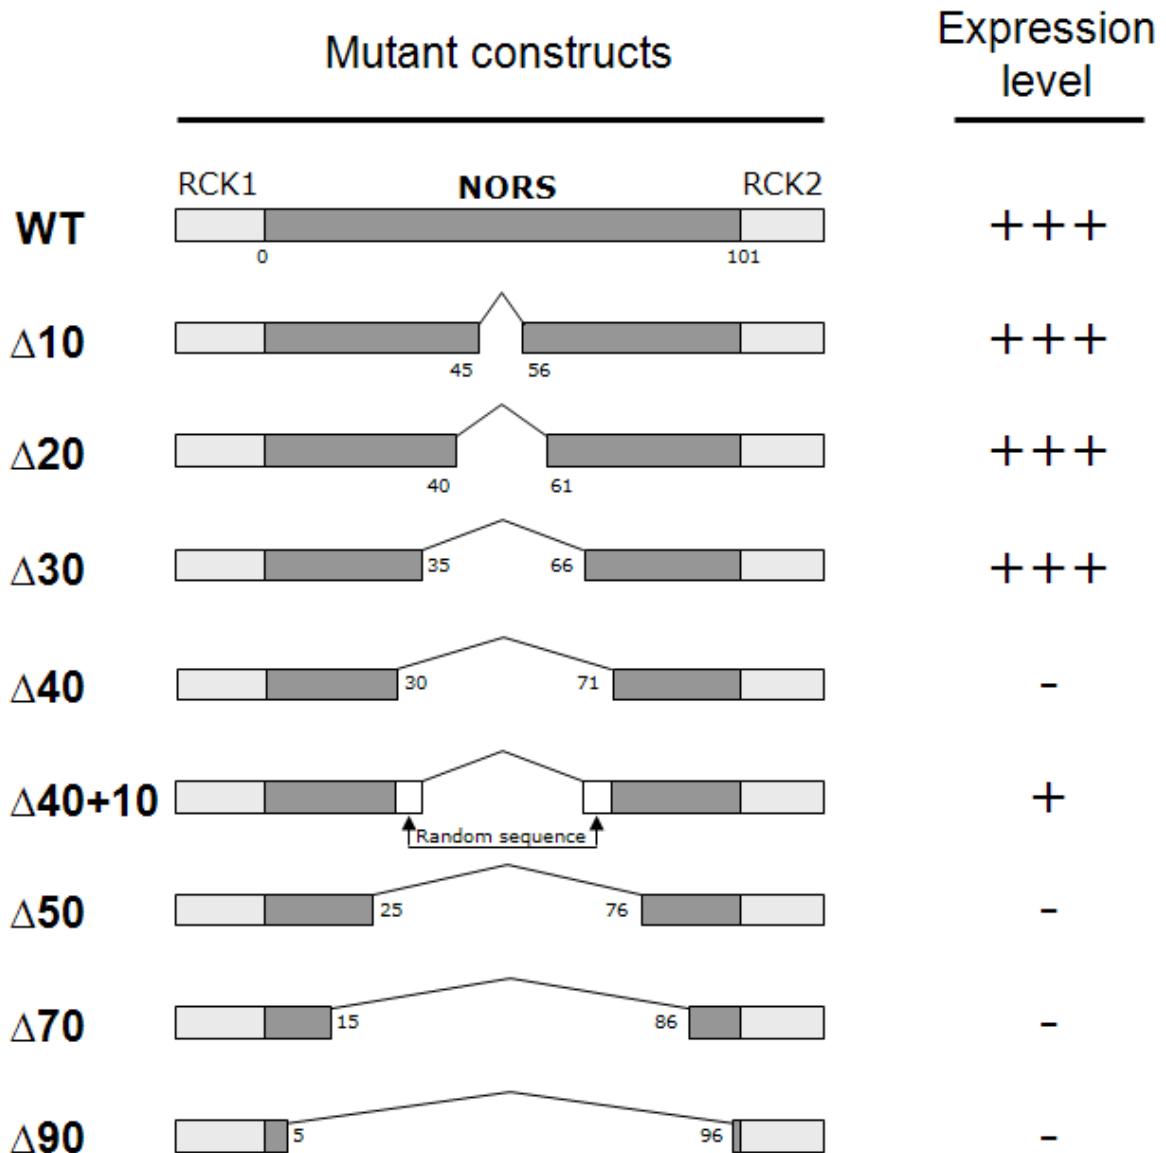

**NORS:**  
 DDVTDPKRIKKCGCRRLEDEQPPTLSPKKKQRNGGMRNSPNTSPKL  
 MRHDPLLPNDQIDNMDSNVKKYDSTGMFHWCAPKEIEKVILTRSEA  
 AMTVLSG

Supplementary Figure 2

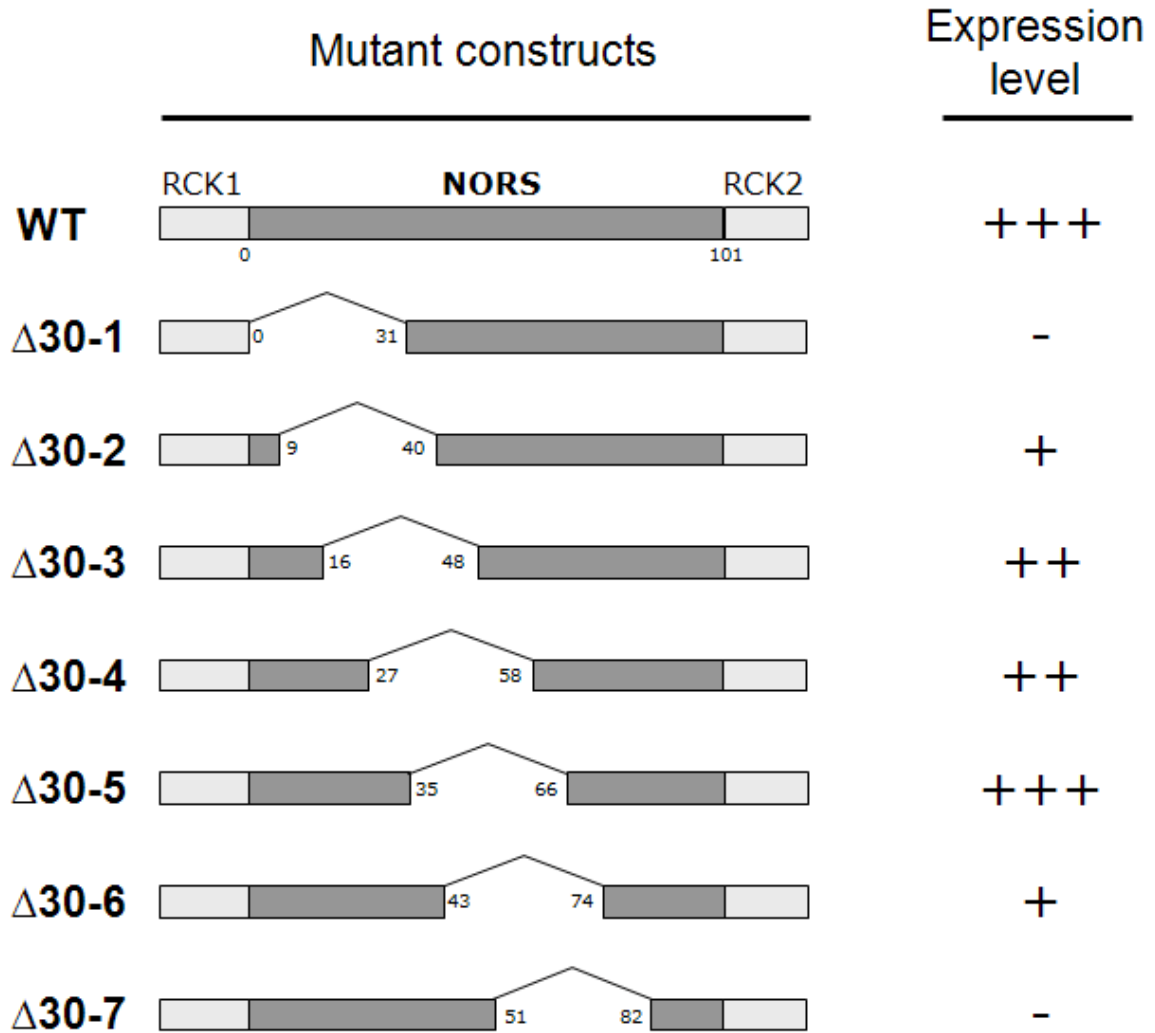

Supplementary Figure 3

**A**

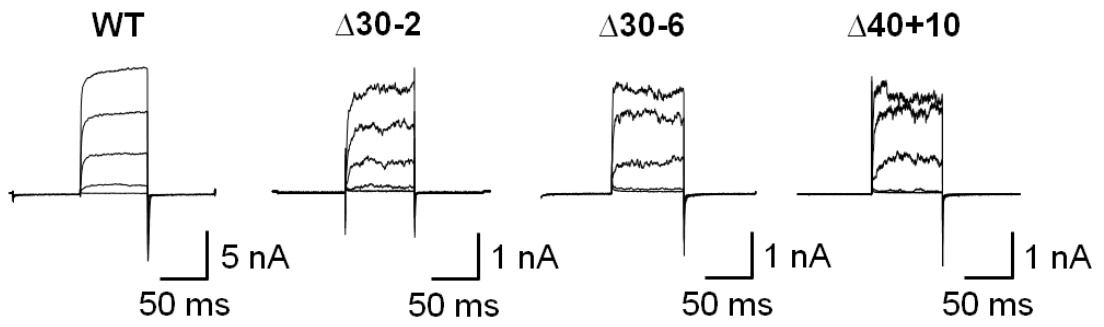

**B**

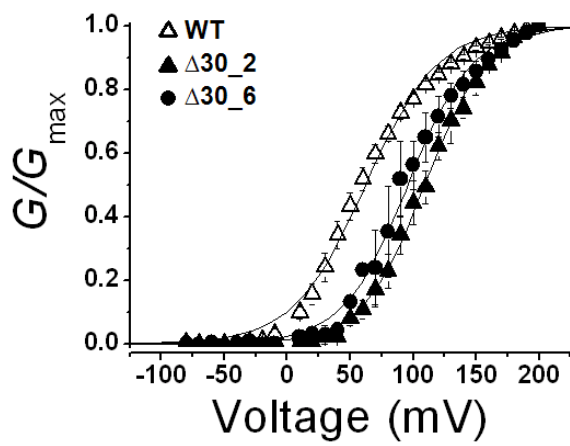

**C**

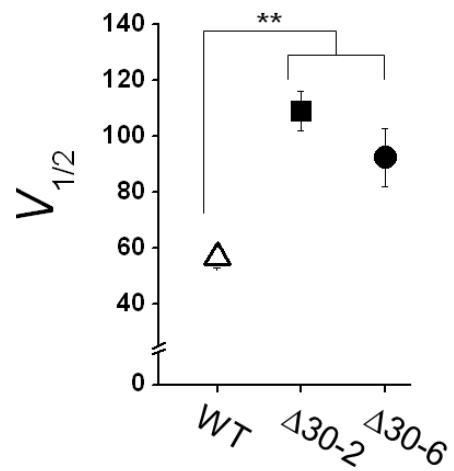

Supplement: mmc1.pdf [file mmc1.pdf]
